# Supplementary material for: Rational design of dual-metal-site catalysts for electroreduction of carbon dioxide
Source: Royal Society of Chemistry journal article supplement (doi:10.1039/d0ta00033g), 2020-01-01
Supplement: d0ta00033g1.pdf [file d0ta00033g1.pdf]

**Electronic Supplementary Information**

**Rational Design of Dual-Metal-Site Catalysts for Electroreduction of  
Carbon Dioxide**

Gan Luo,<sup>†</sup> Yu Jing,<sup>‡</sup> Yafei Li<sup>†\*</sup>

<sup>†</sup>Jiangsu Key Laboratory of New Power Batteries, Jiangsu Collaborative Innovation  
Centre of Biomedical Functional Materials, School of Chemistry and Materials  
Science, Nanjing Normal University, Nanjing 210023, China

<sup>‡</sup>College of Chemical Engineering, Nanjing Forestry University, Nanjing 210037,  
China

To whom correspondence should be addressed. Email: [liyafei@njnu.edu.cn](mailto:liyafei@njnu.edu.cn) (YL)

### Computational details of micro-kinetics simulations

To give an intuitive demonstration of the CRR activity of DMSCs, we further constructed a micro-kinetics model for the conversion of CO<sub>2</sub> to CO, of which the reaction process is summarized as:

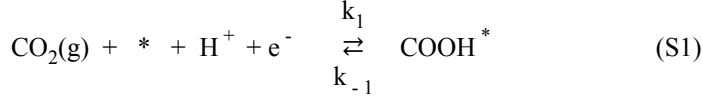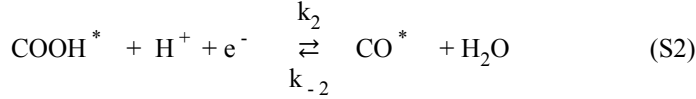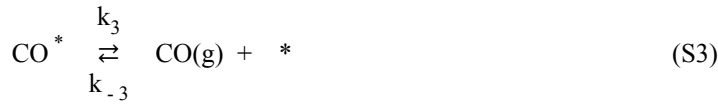

where  $k_i$  ( $i = 1-3$ ) is rate constant, and  $k_{-i}$  is rate constant of the reverse reaction. Based on steady-state approximation, the dynamical coverage rate of  $*_{\text{DMSC}}$ ,  $\text{COOH}^*$  and  $\text{CO}^*$  can be written as:

$$\frac{\partial \theta_{*_{\text{DMSC}}}}{\partial t} = -k_1 \theta_{*_{\text{DMSC}}} P_{\text{CO}_2(\text{g})} + k_{-1} \theta_{\text{COOH}^*} + k_3 \theta_{\text{CO}^*} - k_{-3} \theta_{*_{\text{DMSC}}} P_{\text{CO}(\text{g})} \quad (\text{S4})$$

$$\frac{\partial \theta_{\text{COOH}^*}}{\partial t} = k_1 \theta_{*_{\text{DMSC}}} P_{\text{CO}_2(\text{g})} - k_{-1} \theta_{\text{COOH}^*} - k_2 \theta_{\text{COOH}^*} + k_{-2} \theta_{\text{CO}^*} \quad (\text{S5})$$

$$\frac{\partial \theta_{\text{CO}^*}}{\partial t} = k_2 \theta_{\text{COOH}^*} - k_{-2} \theta_{\text{CO}^*} - k_3 \theta_{\text{CO}^*} + k_{-3} \theta_{*_{\text{DMSC}}} P_{\text{CO}(\text{g})} \quad (\text{S6})$$

where  $\theta$  is the coverage of the reaction intermediate,  $t$  is the time, and  $P_{\text{CO}_2(\text{g})}$  and  $P_{\text{CO}(\text{g})}$  are the pressure of CO<sub>2</sub>(g) and CO(g), respectively. For the simulated kinetic volcano and polarization curves presented in the main text, we set  $P_{\text{CO}_2(\text{g})} = P_{\text{CO}(\text{g})} = 1 \text{ atm}$  and  $0.5 \text{ atm}$ , respectively. Besides, these coverages on a DMSC should be satisfied the following condition :

$$1 = \theta_{*_{\text{DMSC}}} + \theta_{\text{CO}^*} + \theta_{\text{COOH}^*} \quad (\text{S7})$$

On the basis of the transition state theory, for electrochemical step, the rate constant

$k_i$  can be written as<sup>1</sup>

$$k_i = A \exp\left(-\frac{E_{a,i}}{k_B T}\right) \exp\left(-\frac{\beta e(U - U_i^0)}{k_B T}\right) \quad (S8)$$

where  $A$  is a pre-exponential factor,  $E_{a,i}$  is the activation energy for the proton transfer,  $U_i$  is the reversible potential of step  $i$  deduced by  $U_i = -\Delta G_i/e$ ,  $\beta$  is the symmetric factor taken as 0.5.  $k_B$  is the Boltzmann constant, and  $h$  is Planck constant. It is assumed that the  $E_{a,i}$  to be material-independent in the electrochemical process, such

that an effective pre-exponential factor,  $A' = A \exp\left(-\frac{E_{a,i}}{k_B T}\right)$ , can be applied to simplify the expression of rate constant:

$$k_i = A' \exp\left(-\frac{\beta e(U - U_i^0)}{k_B T}\right) \quad (S9)$$

$A' = 3.6 \times 10^4 \text{ s}^{-1}$  is adopt here to reproduce the experimental polarization curve on Au surface with ~5% steps in the sample.<sup>2</sup> In addition, the rate constant for chemical step of CO\* desorption is expressed as,

$$k_3 = \nu \exp\left(-\frac{E_{co}}{k_B T}\right) \quad (S10)$$

where  $E_{CO}$  is the binding energy of CO\* and  $\nu = 10^{13} \text{ s}^{-1}$  is a conventional pre-factor for CO desorption.

The equilibrium constant ( $K_i$ ), which depends on the electrode potential ( $U$ ), is calculated by,

$$K_i = \exp\left(-\frac{eU + \Delta G_i}{k_B T}\right) \quad (S11)$$

For all reaction steps, the  $k_{-i}$  can be calculated from the its rate constant and equilibrium constant; that is,

$$k_{-i} = \frac{k_i}{K_i} \quad (S12)$$

These rate equations are solved at steady state, and then we can get the turn over frequency (TOF).

Finally, the current density ( $j$ ) can be calculated by:

$$j = e\rho TOF_{e^{-}} \quad (\text{S13})$$

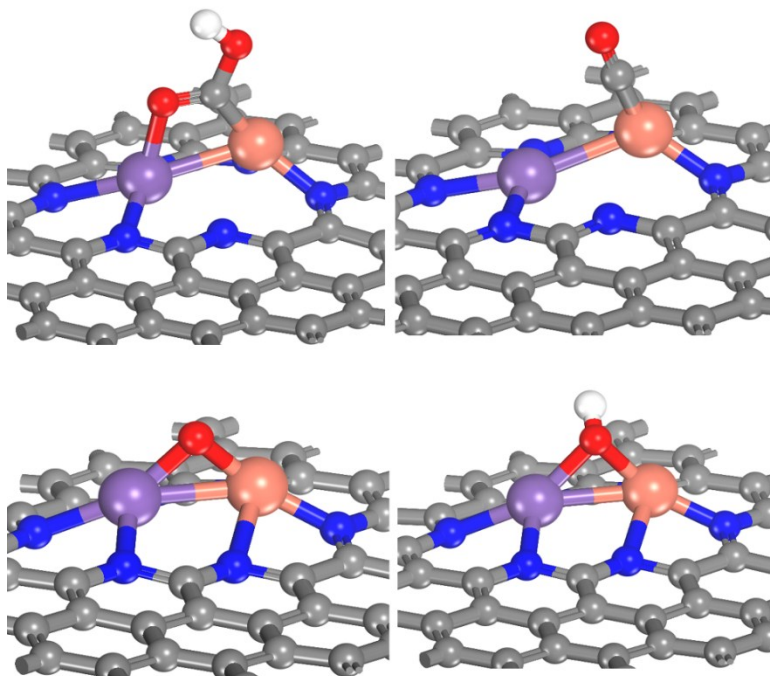

**Fig. S1** The most stable configurations of key intermediates adsorption on Cu/Mn DMSC in the process of CO<sub>2</sub> electroreduction. Grey, dark blue, orange and purple balls represent C, N, Cu and Mn atoms, respectively

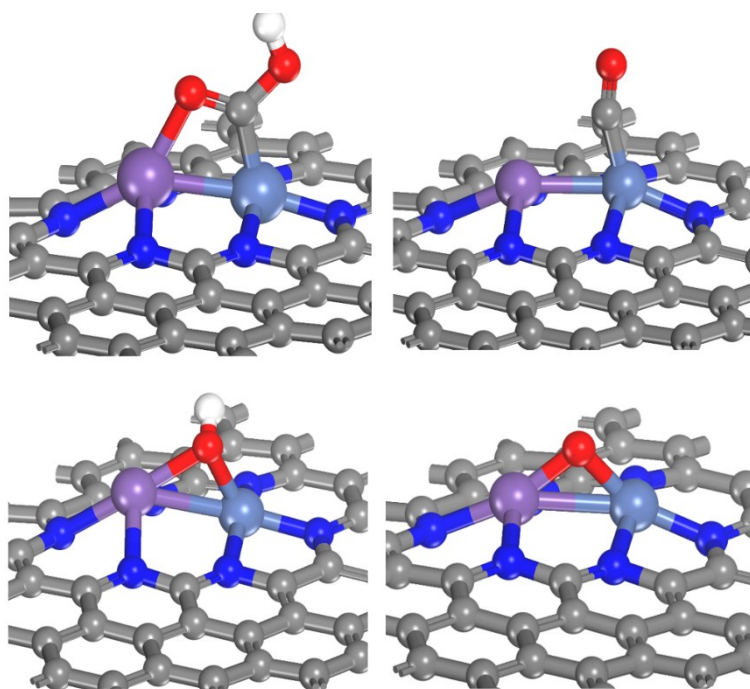

**Fig. S2** The most stable configurations of key intermediates adsorption on Ni/Mn DMSC in the process of CO<sub>2</sub> electroreduction. Grey, dark blue, light blue and purple balls represent C, N, Ni and Mn atoms, respectively

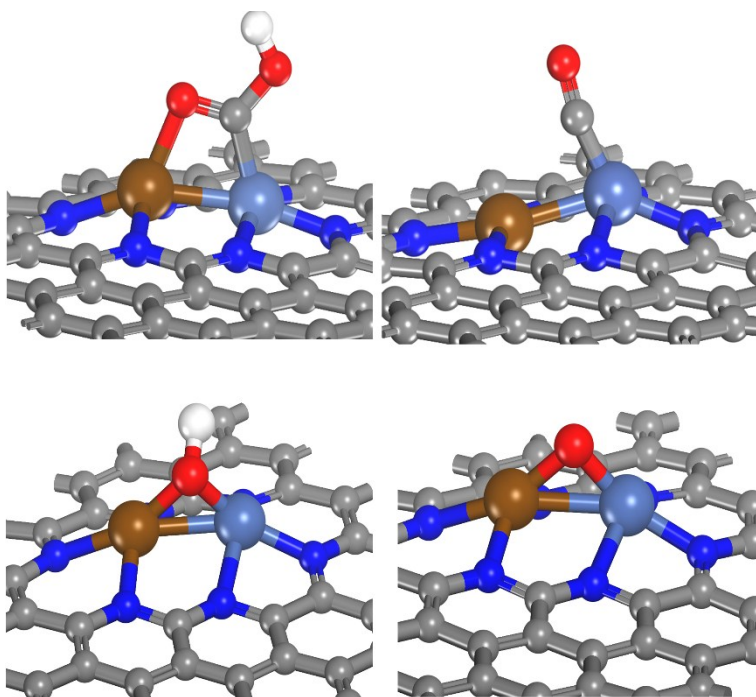

**Fig. S3** The most stable configurations of key intermediates adsorption on Ni/Fe DMSC in the process of CO<sub>2</sub> electroreduction. Grey, dark blue, light blue and brown balls represent C, N, Ni and Fe atoms, respectively

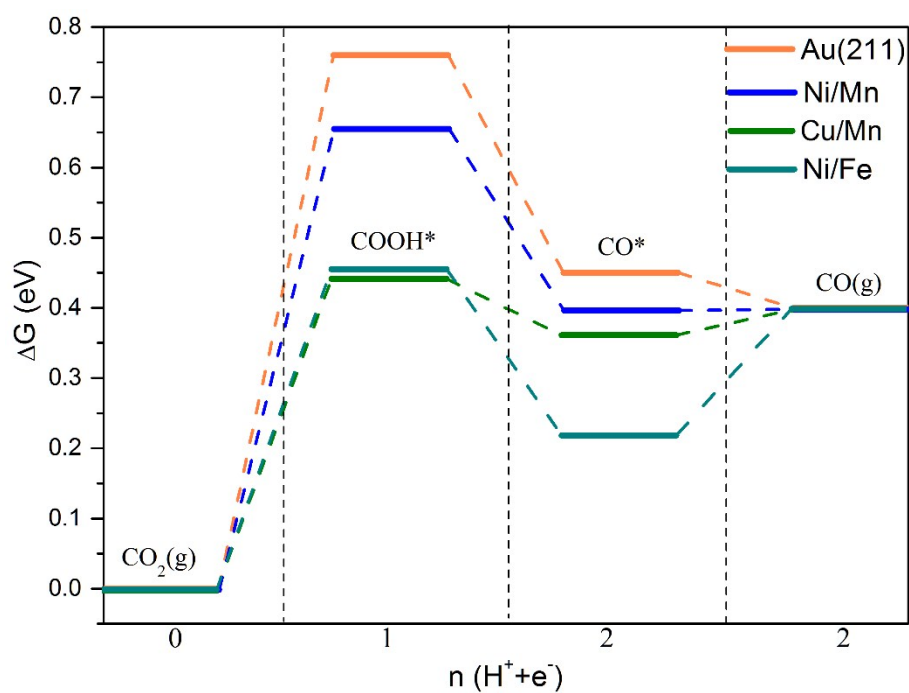

**Fig. S4** The free energy diagrams of  $CO_2$  reduction on Cu/Mn, Ni/Mn and Ni/Fe DMSCs at 0 V vs RHE. The free energy diagram of Au(211) was also plotted for comparison.

**Table S1.** The calculated dissolution potentials ( $U_{\text{dis}}$ ) of transition metal atoms ( $M_1$  or  $M_2$ ) in  $M_1/M_2\text{-N}_6/\text{C}$  DMSCs for the dissolution reaction of  $M_1(M_2) + n\text{H}^+ \leftrightarrow M_1(M_2)^{n+} + n/2\text{H}_2$ .  $U_{\text{dis}}$  is defined as  $U_{\text{dis}} = U_{M_1}^0 + [E_{M_1, \text{bulk}} - (E_{M_1/M_2\text{-N}_6\text{-C}} - E_{M_2\text{-N}_6\text{-C}})]$  or  $U_{\text{dis}} = U_{M_2}^0 + [E_{M_2, \text{bulk}} - (E_{M_1/M_2\text{-N}_6\text{-C}} - E_{M_1\text{-N}_6\text{-C}})]$ .  $U_{M_1}^0$  and  $U_{M_2}^0$  are the standard dissolution potentials of  $M_1$  and  $M_2$  in the bulk phase.<sup>3</sup>

| M             | $U_M^0$ (V) | $U_{\text{dis}}$ (V) |
|---------------|-------------|----------------------|
| Ni@Ni/Fe DMSC | -0.26       | 0.43                 |
| Fe@Ni/Fe DMSC | -0.45       | 0.24                 |
| Cu@Cu/Mn DMSC | 0.34        | 0.72                 |
| Mn@Cu/Mn DMSC | -1.18       | -0.36                |
| Ni@Ni/Mn DMSC | -0.26       | 0.37                 |
| Mn@Ni/Mn DMSC | -1.18       | -0.13                |



**Table S2.** The calculated formation energies ( $E_f$ ) of heteronuclear Cu/Mn, Ni/Mn and Ni/Fe DMSCs and compared to those of homonuclear Cu/Cu, Mn/Mn, Fe/Fe/ and Ni/Ni DMSCs.  $E_f$  is defined as  $E_f = E_{M1/M2-N6-C} - \mu_{M1} - \mu_{M2} - n\mu_C - m\mu_N$ , where  $E_{M1/M2-N6-C}$  is the total energy of DMSC,  $\mu_{M1}$  and  $\mu_{M2}$  are the chemical potentials of  $M_1$ ,  $M_2$ , carbon and N atoms, respectively.  $n$  and  $m$  are the number of C and N atoms in the supercell, respectively. The total energies of bulk metals, graphene and nitrogen molecule were computed to obtain the chemical potentials for corresponding elements.

| DMSC            | Cu/Mn | Ni/Mn | Fe/Ni | Cu/Cu | Mn/Mn | Ni/Ni | Fe/Fe |
|-----------------|-------|-------|-------|-------|-------|-------|-------|
| $E_f$ (eV/atom) | 0.093 | 0.102 | 0.120 | 0.104 | 0.118 | 0.121 | 0.162 |

## References

- <sup>1</sup>S. Vilekar, I. Fishtik, R. Datta, *J. Electrochem. Soc.* 2010, **157**, B1040-B1050.
- <sup>2</sup>M. P. Andersson, F. Abild-Pedersen, I. N. Remediakis, T. Bligaard, G. Jones, J. Engbaek, O. Lytken, S. Horch, J. H. Nielsen, J. Sehested, *J. Catal.* 2008, **255**, 6-19.
- <sup>3</sup>J. Greeley, J. K. Nørskov, *Electrochimica Acta*, 2007, **52**, 5829-5836
